# Supplementary material for: Inhibitory Effect of Ursolic Acid on the Migration and Invasion of Doxorubicin-Resistant Breast Cancer
Source: MDPI journal article supplement (doi:10.3390/molecules27041282), 2022-02-14
Supplement: s1 [file s1]

# **Inhibitory Effect of ursolic acid against the migration and invasion of Doxorubicin-resistant breast cancer**

Li Zong<sup>1, †</sup>, Guorong Cheng<sup>1, †</sup>, Jingwu Zhao<sup>1</sup>, Xiaoyu Zhuang<sup>2\*</sup>, Zhong Zheng<sup>1</sup>,

Zhiqiang Liu<sup>1</sup>, Fengrui Song<sup>1, \*</sup>

<sup>1</sup> State Key Laboratory of Electroanalytical Chemistry, Jilin Province Key Laboratory of Chinese Medicine Chemistry and Mass Spectrometry, Changchun Institute of Applied Chemistry, Chinese Academy of Sciences, Changchun 130022, China; zongliciac@126.com (L.Z.); mslab26@ciac.ac.cn (G.C.); mslab21@ciac.ac.cn (Z.P.); zhengzh@ciac.ac.cn (Z.Z.); liuzq@ciac.ac.cn (Z.L.)

<sup>2</sup> Experiment Center for Science and Technology, Shanghai University of Traditional Chinese Medicine, Shanghai, 201203, China;

<sup>†</sup> These authors contributed equally to this work.

\* Correspondence: xyzhuang59@foxmail.com (X.Z.) and songfr@ciac.ac.cn (F.S.)

**Table S1.** Multiple reaction monitoring (MRM) parameters for ten analytes.

| Analytes  | MRM transition<br>(m/z)  | Cone voltage<br>(V) | Collision energy<br>(eV) | Ion<br>mode |
|-----------|--------------------------|---------------------|--------------------------|-------------|
| Arg       | 175.1>70.1 <sup>a</sup>  | 14                  | 12                       | positive    |
|           | 175.1>60.1               | 14                  | 18                       | positive    |
| Orn       | 133.1>70.1 <sup>a</sup>  | 16                  | 14                       | positive    |
|           | 133.1>116.0              | 16                  | 10                       | positive    |
| Met       | 150.0>104.1 <sup>a</sup> | 20                  | 10                       | positive    |
|           | 150.0>133.03             | 20                  | 8                        | positive    |
| SAM       | 399.3>136.1 <sup>a</sup> | 16                  | 22                       | positive    |
|           | 399.3>250.1              | 16                  | 14                       | positive    |
| MTA       | 298.2>136.1 <sup>a</sup> | 18                  | 18                       | positive    |
|           | 298.2>119.1              | 18                  | 40                       | positive    |
| Put       | 89.2>72.1 <sup>a</sup>   | 10                  | 8                        | positive    |
| Spd       | 146.1>112.1 <sup>a</sup> | 18                  | 10                       | positive    |
|           | 146.1>72.2               | 18                  | 14                       | positive    |
| Spm       | 203.2>84.1 <sup>a</sup>  | 18                  | 28                       | positive    |
|           | 203.2>112.2              | 18                  | 18                       | positive    |
| Acetylspn | 245.3>129.1 <sup>a</sup> | 18                  | 14                       | positive    |
|           | 245.3>100.1              | 18                  | 18                       | positive    |
| IS        | 117.0>100.1 <sup>a</sup> | 30                  | 10                       | positive    |
|           | 117.0>55.2               | 30                  | 16                       | positive    |

<sup>a</sup>precursor/product ion pair was used for quantification of the analytes.

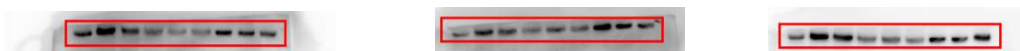

**Figure S1.** Original western blots images of ODC (n=3).

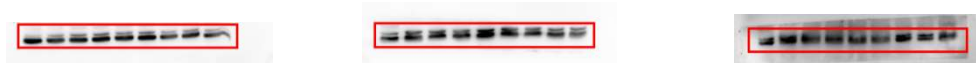

**Figure S2.** Original western blots images of Erk1/2 (n=3).

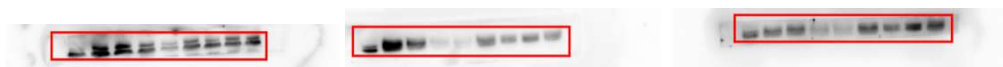

**Figure S3.** Original western blots images of P-Erk1/2 (n=3).

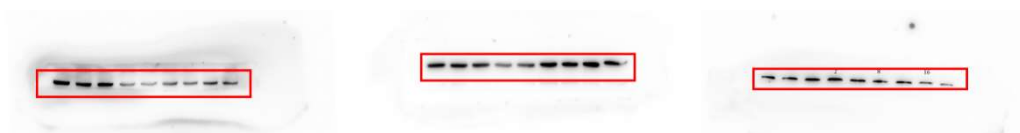

**Figure S4.** Original western blots images of VEGF (n=3).

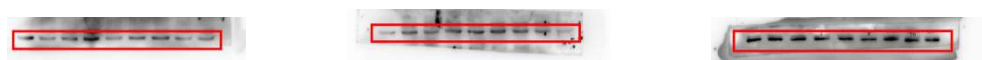

**Figure S5.** Original western blots images of MMP-9 (n=3).

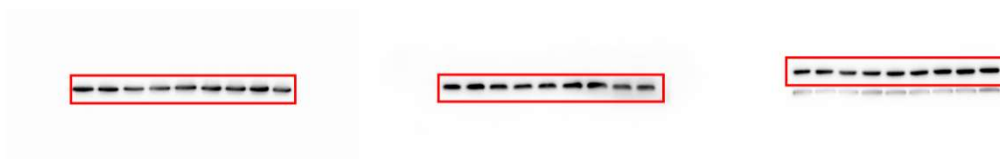

**Figure S6.** Original western blots images of GAPDH (n=3).
